# Supplementary material
Source: publisher figshare collection journal article supplement (https://plos.figshare.com/articles/dataset/_/5425105)
Supplement: Supplementary file [file 1]

## Supporting Information

Hariri, *et al.* “Plant Flavones Enhance Antimicrobial Activity of Respiratory Epithelial Cell Secretions Against *Pseudomonas aeruginosa*”

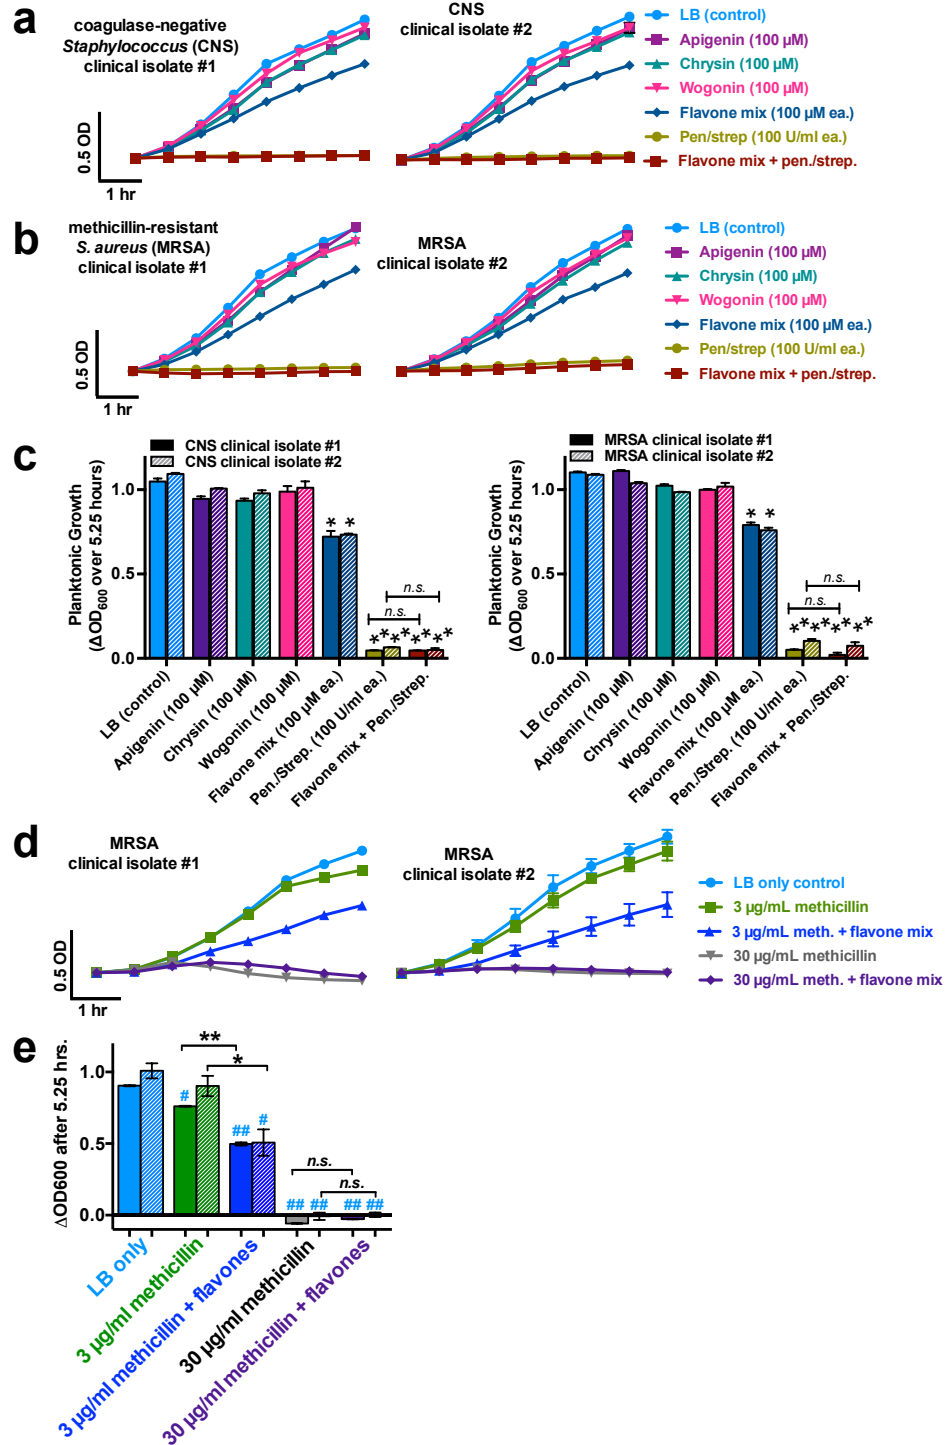

**S2 Fig. Effects of flavones on planktonic *Staphylococcus* growth.** (A) Planktonic growth curves of two clinical isolates of coagulase-negative *Staphylococcus* (CNS). (B) Planktonic growth curves of two clinical isolates of methicillin-resistant *Staphylococcus aureus* (MRSA). (C) Bar graphs showing planktonic growth over 5.25 hrs. from experiments above ( $n = 4$  experiments for each condition). Individual flavones had no significant effect on planktonic growth, but a mixture of flavones (100  $\mu$ M each apigenin, chrysin, wogonin) slightly but significantly reduced planktonic growth ( $p < 0.05$  vs. control). The changes in OD<sub>600</sub> after 5.25 hrs. were  $1.04 \pm 0.02$  (CNS #1),  $1.09 \pm 0.005$  (CNS #2),  $1.10 \pm 0.005$  (MRSA #1),  $1.09 \pm 0.004$  (MRSA #2) in control conditions and  $0.72 \pm 0.03$  (CNS #1;  $p < 0.05$  vs control),  $0.73 \pm 0.01$  (CNS #2;  $p < 0.05$  vs control),  $0.79 \pm 0.015$  (MRSA #1;  $p < 0.05$  vs control), and  $0.76 \pm 0.01$  (MRSA #2;  $p < 0.05$  vs control) in cells exposed to apigenin, chrysin, and wogonin (100  $\mu$ M each). (D) Growth curves of the two MRSA isolates with low (3  $\mu$ g/ml) and high (30  $\mu$ g/ml) concentrations of methicillin  $\pm$  flavones. (E) Bar graphs of data from D. Flavones significantly enhanced the inhibition of planktonic growth of both MRSA strains in the presence of 3  $\mu$ g/ml methicillin ( $p < 0.01$  vs. 3  $\mu$ g/ml methicillin alone for strain #1 [solid bars] and  $p < 0.05$  for strain #2 [crossed bars]). The changes in OD<sub>600</sub>

were  $0.90 \pm 0.004$  (MRSA #1) and  $0.90 \pm 0.05$  (MRSA #2) in control conditions,  $0.76 \pm 0.004$  (MRSA #1;  $p < 0.05$  compared with control) and  $0.90 \pm 0.07$  (MRSA #2; n.s. compared with control) with 3  $\mu$ g/ml methicillin, and  $0.50 \pm 0.01$  (MRSA #1;  $p < 0.05$  compared with control;  $p < 0.01$  vs methicillin only) and  $0.51 \pm 0.1$  (MRSA #2;  $p < 0.05$  compared with control;  $p < 0.05$  vs methicillin only) with flavone mixture plus 3  $\mu$ g/ml methicillin. For all graphs, \* =  $p < 0.05$ , \*\* =  $p < 0.01$ .
