# Supplementary material
Source: publisher figshare collection journal article supplement (https://plos.figshare.com/articles/dataset/_/5425105)
Supplement: Supplementary file [file 1]

Supporting Information

Hariri, *et al.* “Plant Flavones Enhance Antimicrobial Activity of Respiratory Epithelial Cell Secretions Against *Pseudomonas aeruginosa*”

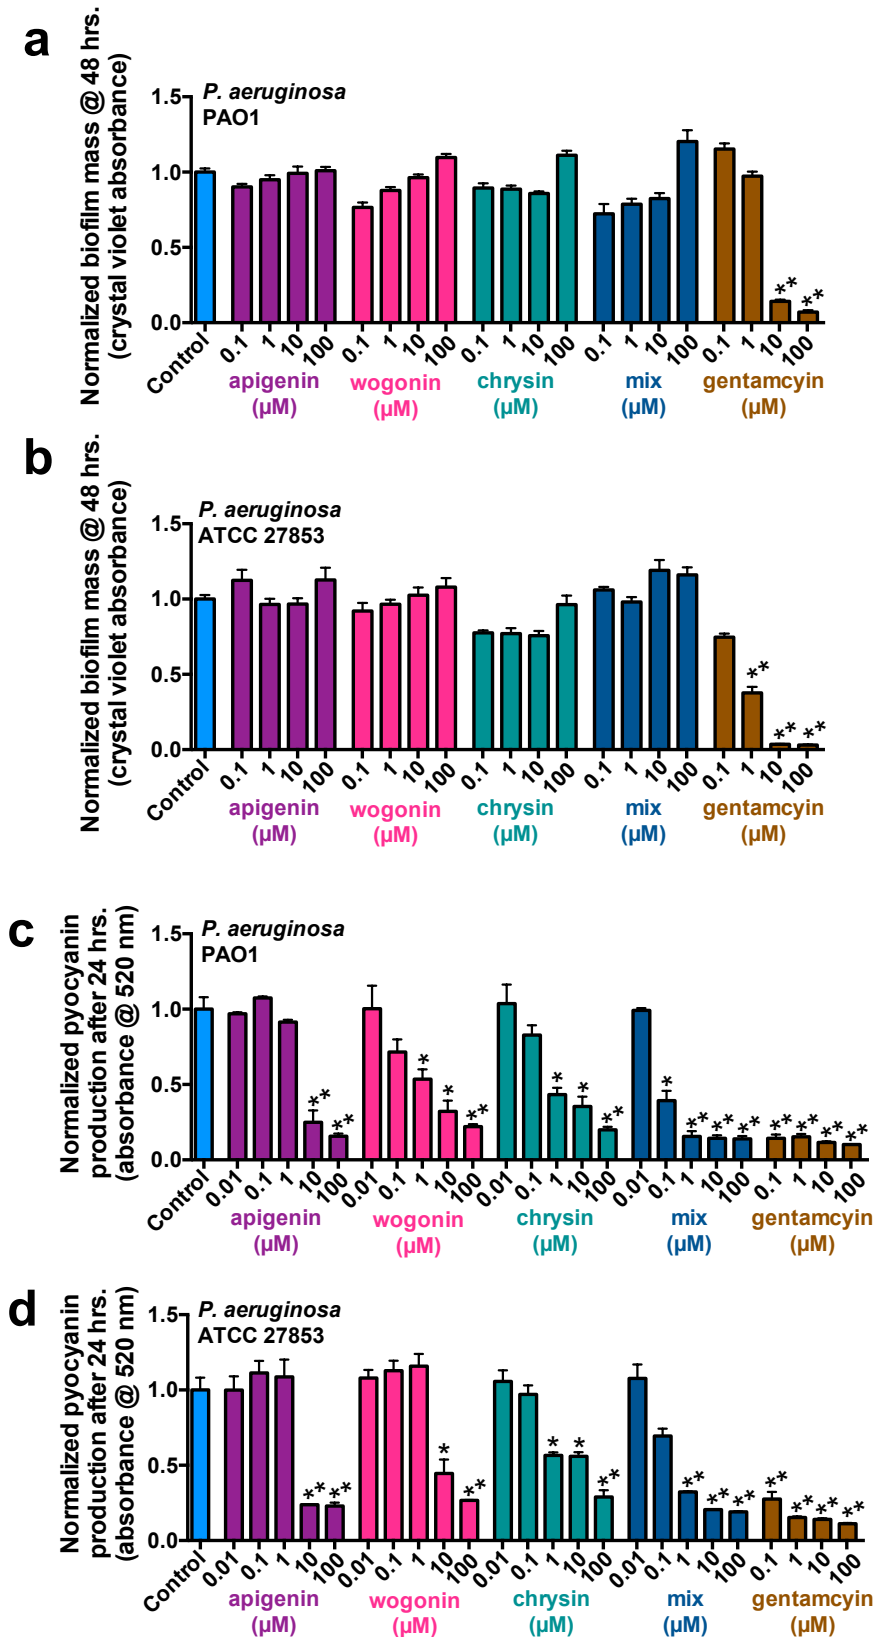

S4 Fig. Bitter flavones do not affect *P.aeruginosa* biofilm formation but do reduce pyocyanin production. (A and B)

Results from crystal violet biofilm assays using two strains of *P. aeruginosa* in the presence of flavones, showing no significant effect of 3 individual flavones or a mix. (C and D), Pyocyanin production was measured from two *P. aeruginosa* strains after 24 hrs. culture in Müller-Hinton broth. Apigenin, wogonin, and chrysin significantly reduced pyocyanin production at effective concentrations of 1-10  $\mu$ M. For all graphs, \* =  $p < 0.05$ , \*\* =  $p < 0.01$ .
